# Supplementary material
Source: PubMed Central journal article supplement (PMC3889740)
Supplement: JCM.00515-13_zjm999092882so1.pdf [file JCM.00515-13_zjm999092882so1.pdf]

**TABLE S1.** Strain distribution for each of the studied species of *Nocardia*.

| <b>Species<br/>(Strain no.)</b>     | <b>Spanish<br/>provinces (no.)</b> | <b>Clinical origins of the samples</b>                                                                                                                                                                    |
|-------------------------------------|------------------------------------|-----------------------------------------------------------------------------------------------------------------------------------------------------------------------------------------------------------|
| <i>N. abscessus</i><br>(n=29)       | 18                                 | 24 respiratory system (13 sputum, 3 bronchial alveolar lavage, 6 bronchial alveolar aspirate, 1 nasal aspirate, 1 tracheal aspirate)<br>2 central nervous system, 2 blood, 1 cutaneous                    |
| <i>N. cyriacigeorgica</i><br>(n=30) | 16                                 | 24 respiratory system (10 bronchial alveolar aspirates, 8 sputum samples, 4 bronchial alveolar lavages, 1 tracheal aspirate, and 1 pleural fluid sample),<br>2 central nervous system, 2 genital, 2 blood |
| <i>N. farcinica</i><br>(n=31)       | 18                                 | 22 respiratory system (13 sputum, 7 pulmonary abscess, 1 bronchial alveolar lavage, and 1 bronchial alveolar aspirate)<br>4 skin, 3 central nervous system and 2 blood                                    |
| <i>N. nova</i><br>(n=29)            | 10                                 | 26 respiratory system (19 sputum, 4 bronchial alveolar aspirates, 2 pleural fluid and 1 tracheal aspirate)<br>1 skin and 2 internal tissues                                                               |

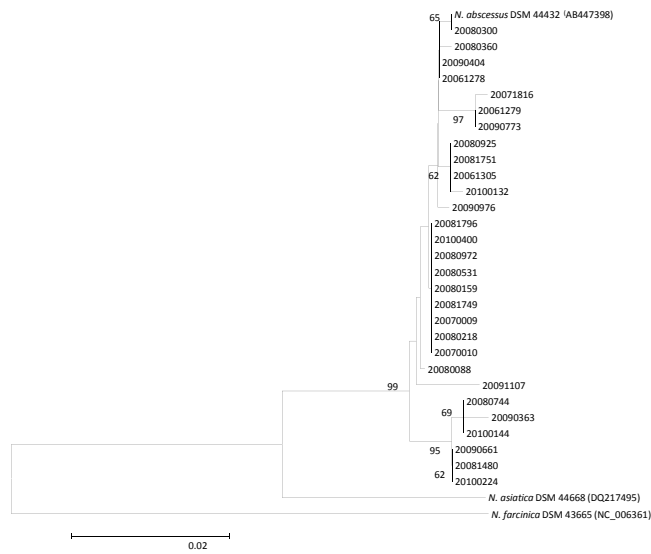

a) *N. abscessus*

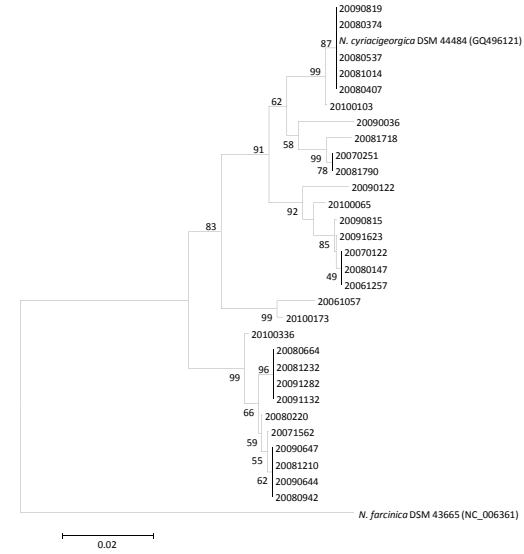

b) *N. cyriacigeorgica*

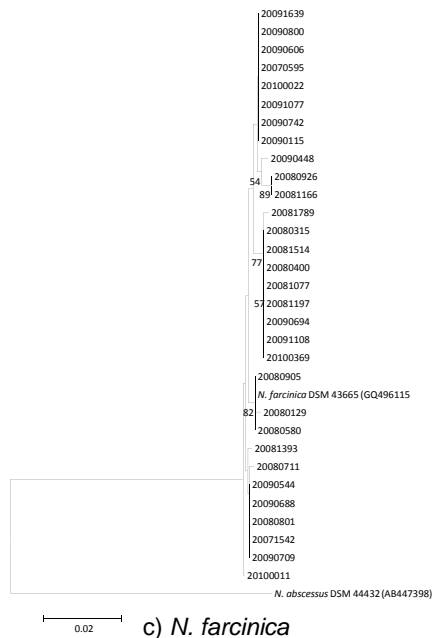

c) *N. farcinica*

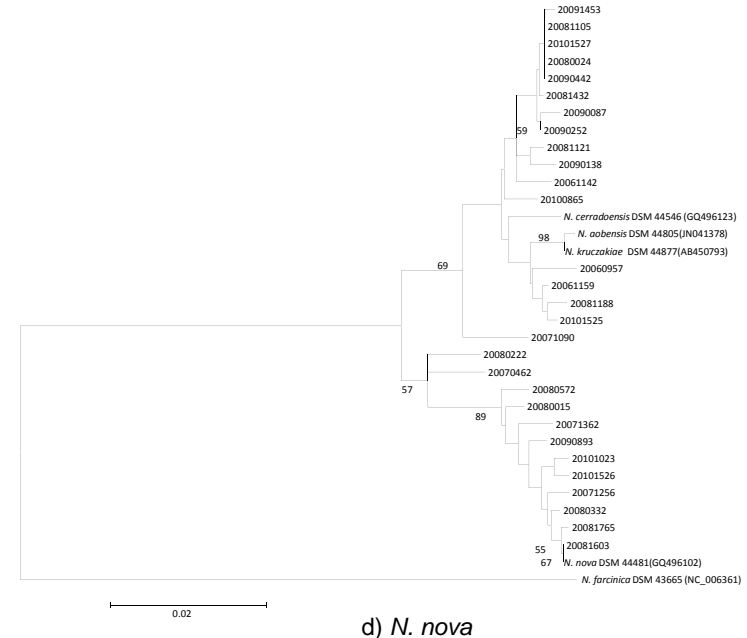

d) *N. nova*

**FIG. S1.** Phylogenetic trees according to neighbor-joining methods based on *gyrB* gene of *Nocardia* spp. four more prevalent species in Spain. Bootstrap values are expressed as a percentage of 1,000 replications. The scale bar represents 0.02 substitutions per nucleotide position. *N. farcinica* DSM 43665 is used as outgroup, except in case of *N. farcinica* analysis when it is substituted by *N. abscessus* DSM 43665.

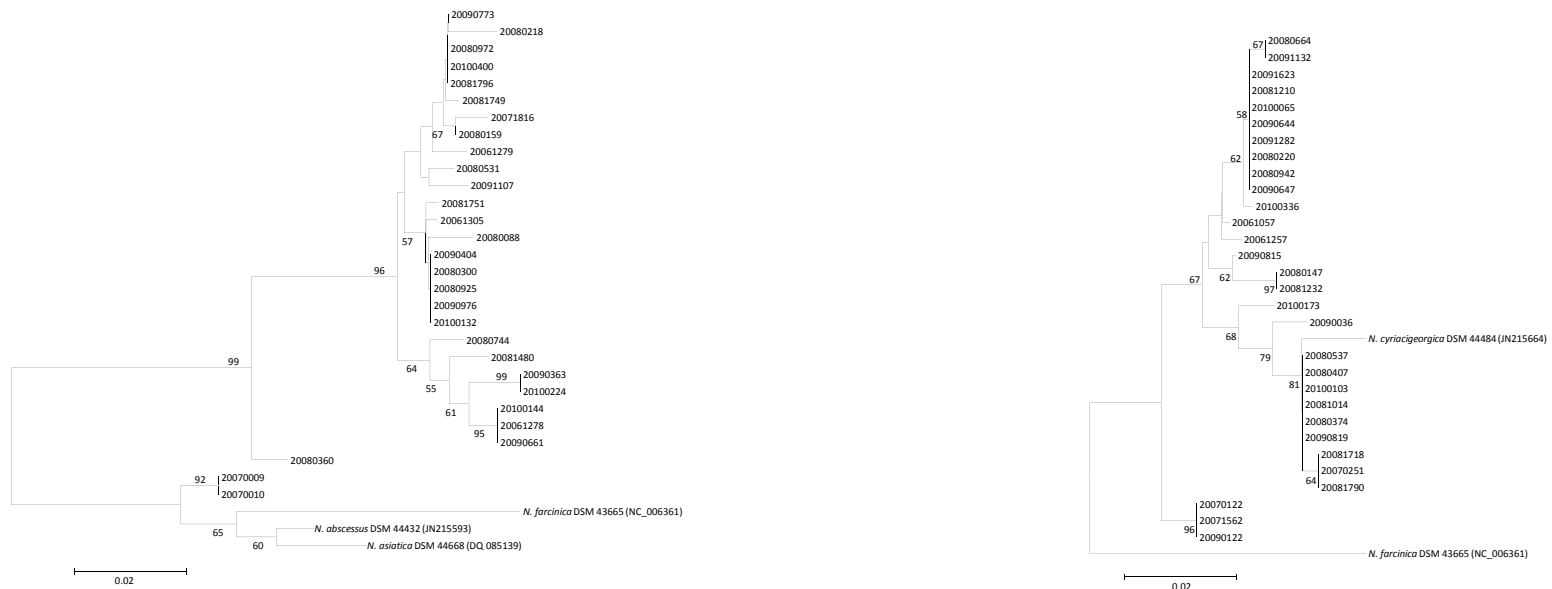

a) *N. abscessus*

b) *N. cyriacigeorgica*

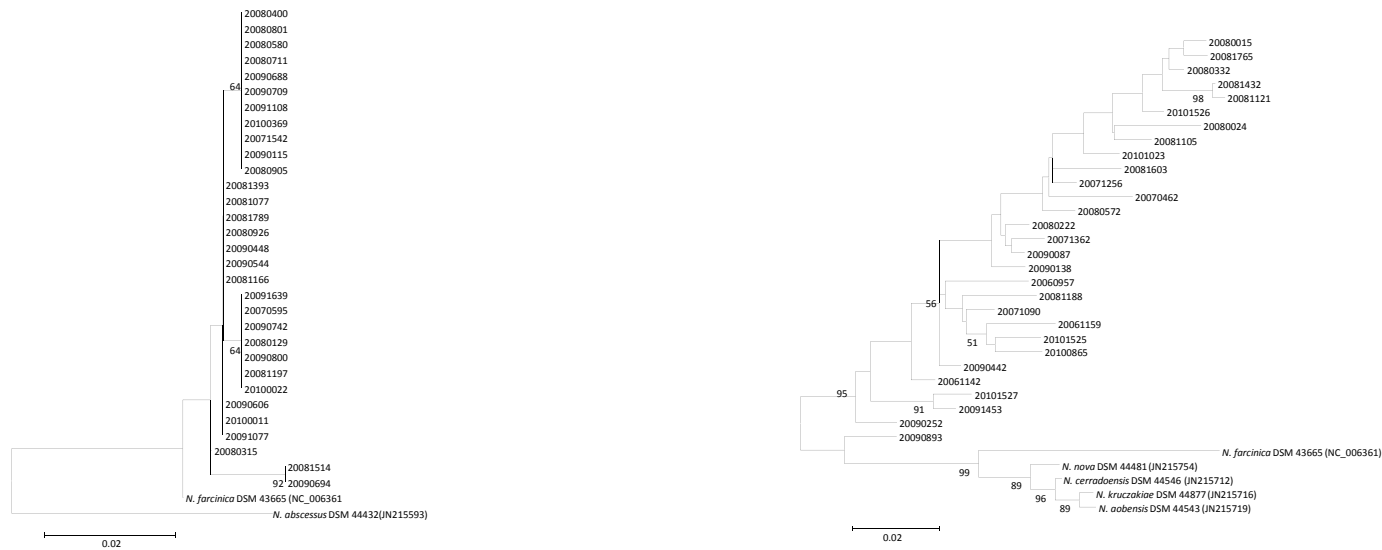

c) *N. farcinica*

d) *N. nova*

**FIG. S2.** Phylogenetic trees according to neighbor-joining methods based on *rpoB* gene of *Nocardia* spp. four more prevalent species in Spain. Bootstrap values are expressed as a percentage of 1,000 replications. The scale bar represents 0.02 substitutions per nucleotide position. *N. farcinica* DSM 43665 is used as outgroup, except in case of *N. farcinica* analysis when it is substituted by *N. abscessus* DSM 44432.

**FIG. S3.** Polymorphisms in the different GyrB-types found in the *N. nova* population (n=29).

| Strain ID <sup>1,2</sup>                     | Position <sup>3</sup> |       |       |       |       |        |       |       |       | Similarity Identity (%) <sup>4,5</sup> | GenBank acc. no. |
|----------------------------------------------|-----------------------|-------|-------|-------|-------|--------|-------|-------|-------|----------------------------------------|------------------|
|                                              | 4 8                   | 1 0 1 | 1 0 5 | 1 2 5 | 1 2 8 | 1 2 9' | 1 3 1 | 1 5 7 | 2 1 5 |                                        |                  |
| <i>N. nova</i> DSM 44481 <sup>T</sup>        | G                     | E     | D     | A     | A     | –      | E     | P     | V     | 100                                    | GQ496102         |
| CNM20101526                                  | .                     | .     | .     | .     | .     | –      | .     | .     | .     | 100 (100)                              | KC631363         |
| CNM20071362                                  | .                     | .     | E     | .     | .     | –      | .     | .     | .     | 100 (99.6)                             | KC631362         |
| CNM20080015                                  | .                     | .     | .     | .     | .     | –      | .     | A     | .     | 99 (100)                               | KC631361         |
| CNM20080222                                  | .                     | .     | .     | .     | .     | P      | P     | A     | .     | 98 (99.8)                              | KC631360         |
| <i>N. cerradoensis</i> DSM44546 <sup>T</sup> | .                     | .     | E     | T     | T     | P      | P     | A     | .     | 96 (98.1)                              | AB450777         |
| <i>N. aobensis</i> DSM 44805 <sup>T</sup>    | .                     | Q     | E     | S     | .     | P      | P     | A     | .     | 96 (97.9)                              | AB447401         |
| <i>N. kruczakiae</i> DSM 44877 <sup>T</sup>  | .                     | Q     | E     | S     | .     | P      | P     | A     | .     | 96 (98.1)                              | AB450793         |
| CNM20061159                                  | .                     | Q     | E     | S     | .     | P      | P     | A     | .     | 97 (99.2)                              | KC631359         |
| CNM20060957                                  | D                     | Q     | E     | S     | .     | P      | P     | A     | .     | 97 (99.2)                              | KC631358         |
| CNM20081188                                  | .                     | Q     | E     | N     | .     | P      | P     | A     | .     | 97 (99.2)                              | KC631357         |
| CNM20090138                                  | .                     | Q     | E     | T     | .     | P      | R     | A     | .     | 97 (100)                               | KC631356         |
| CNM20061142                                  | S                     | Q     | E     | T     | .     | P      | P     | A     | .     | 97 (100)                               | KC631355         |
| CNM20081105                                  | .                     | Q     | E     | T     | .     | P      | P     | A     | .     | 97 (99.8)                              | KC631354         |
| CNM20071090                                  | .                     | Q     | E     | T     | .     | P      | P     | A     | F     | 97 (99.6)                              | KC631353         |

<sup>1</sup>Identification of the reference/studied strains; <sup>2</sup>Strains representatives of the different GyrB-types mentioned in Figure S1; <sup>3</sup>Positions of the amino acid change respect to *N. nova* DSM 44481<sup>T</sup>; <sup>4,5</sup>Similarity identity coefficient, expressed as percentage, respect to *N. nova* DSM 44481<sup>T</sup> GyrB protein sequence (CV89659) and 16S (GQ376190).
